# Supplementary material for: Accuracy of Assignment of Atlantic Salmon (Salmo salar L.) to Rivers and Regions in Scotland and Northeast England Based on Single Nucleotide Polymorphism (SNP) Markers
Source: PLoS One. 2016 Oct 10;11(10):e0164327. doi: 10.1371/journal.pone.0164327 (PMC5056707; doi:10.1371/journal.pone.0164327)
Supplement: S1 Table — (XLSX) [file pone.0164327.s003.xlsx]

## Sheet: S1
Sample sites contained in the baseline and numbers of fish at each site
Country	River	Site	Latitude	Longitude	Sample number			River	Number of sites	Sample number
Scotland	River Awe	Site_01	56.4368	-5.21816	32			Abhainn Ghriomarstaidh	3	60
Scotland	River Awe	Site_02	56.5307	-4.77007	32			Aln	2	48
Scotland	River Ayr	Site_01	55.4498	-4.17277	32			Carnoch River	1	32
Scotland	River Ayr	Site_02	55.5208	-4.17113	32			Coquet	4	96
Scotland	River Beauly	Site_01	57.4043	-4.86205	24			Esk	2	48
Scotland	River Beauly	Site_02	57.3309	-4.78946	24			Gruinard River	3	62
Scotland	River Beauly	Site_03	57.4546	-4.48935	24			Ouse	2	48
Scotland	River Conon	Site_01	57.5441	-4.85083	32			Oykel - Cassley - Shin System	5	157
Scotland	River Conon	Site_02	57.5356	-4.57943	32			River Awe	2	64
Scotland	River Dee	Site_01	57.0605	-2.56118	30			River Ayr	2	64
Scotland	River Dee	Site_02	57.0126	-3.4036	32			River Beauly	3	72
Scotland	River Dee	Site_03	57.0564	-3.06827	32			River Carron	2	64
Scotland	River Dee	Site_04	57.0009	-3.45184	32			River Conon	2	64
Scotland	River Dee	Site_05	57.0438	-2.37844	32			River Dee	8	252
Scotland	River Dee	Site_06	57.0937	-2.79465	31			River Deveron	5	144
Scotland	River Dee	Site_07	57.0161	-3.38661	32			River Dionard	2	38
Scotland	River Dee	Site_08	57.0081	-2.55733	31			River Don	4	87
Scotland	River Deveron	Site_01	57.29	-3.02543	32			River Findhorn	3	71
Scotland	River Deveron	Site_02	57.3578	-3.07013	32			River Forth	3	70
Scotland	River Deveron	Site_03	57.403	-2.79858	32			River Helmsdale	2	64
Scotland	River Deveron	Site_04	57.5537	-2.94746	32			River Lossie	2	48
Scotland	River Deveron	Site_05	57.5368	-2.46772	16			River Moidart	1	31
Scotland	River Dionard	Site_01	58.4471	-4.86185	19			River Nairn	1	24
Scotland	River Dionard	Site_02	58.4788	-4.85241	19			River Naver	3	95
Scotland	River Don	Site_01	57.2447	-2.85226	24			River Ness	5	120
Scotland	River Don	Site_02	57.2407	-2.33401	21			River Nith	3	92
Scotland	River Don	Site_03	57.3415	-2.5454	23			River North Esk	12	232
Scotland	River Don	Site_04	57.224	-3.13097	19			River Snizort	2	64
Scotland	River Findhorn	Site_01	57.4531	-3.67205	24			River South Esk	14	333
Scotland	River Findhorn	Site_02	57.2587	-4.09217	24			River Spey	8	253
Scotland	River Findhorn	Site_03	57.602	-3.65656	23			River Tay	12	296
Scotland	River Forth	Site_01	56.3541	-4.37086	23			River Tweed	8	226
Scotland	River Forth	Site_02	56.228	-4.372	24			River Ugie	2	39
Scotland	River Forth	Site_03	56.1713	-4.03739	23			River Ythan	3	65
Scotland	Gruinard River	Site_01	57.8421	-5.40487	21			Tees	2	48
Scotland	Gruinard River	Site_02	57.8099	-5.37533	20			Tyne	5	120
Scotland	Gruinard River	Site_03	57.7436	-5.2855	21			Wear	4	96
Scotland	River Carron	Site_01	57.8861	-4.44941	32			Total	147	3787
Scotland	River Carron	Site_02	57.8465	-4.66494	32
Scotland	Oykel - Cassley - Shin System	Site_01	58.0758	-4.72366	30
Scotland	Oykel - Cassley - Shin System	Site_02	58.158	-4.81462	32
Scotland	Oykel - Cassley - Shin System	Site_03	57.8985	-4.84505	32
Scotland	Oykel - Cassley - Shin System	Site_04	58.0623	-4.85195	32
Scotland	Oykel - Cassley - Shin System	Site_05	58.0097	-4.39801	31
Scotland	Carnoch River	Site_01	56.687	-5.497	32
Scotland	River Moidart	Site_01	56.7833	-5.71823	31
Scotland	River Lossie	Site_01	57.6085	-3.33717	24
Scotland	River Lossie	Site_02	57.6468	-3.25648	24
Scotland	River Nairn	Site_01	57.4591	-4.09714	24
Scotland	River Helmsdale	Site_01	58.23	-3.92261	32
Scotland	River Helmsdale	Site_02	58.1428	-3.71042	32
Scotland	River Naver	Site_01	58.2017	-4.34797	31
Scotland	River Naver	Site_02	58.4532	-4.1906	32
Scotland	River Naver	Site_03	58.2829	-4.51027	32
Scotland	River Ness	Site_01	57.4331	-4.29638	24
Scotland	River Ness	Site_02	57.3348	-4.57687	24
Scotland	River Ness	Site_03	57.0678	-4.83273	24
Scotland	River Ness	Site_04	57.1243	-4.71677	24
Scotland	River Ness	Site_05	57.1896	-4.76806	24
Scotland	River Nith	Site_01	55.4347	-3.87325	30
Scotland	River Nith	Site_02	55.2376	-4.02719	31
Scotland	River Nith	Site_03	55.3055	-3.95486	31
Scotland	River North Esk	Site_01	56.7807	-2.61619	10
Scotland	River North Esk	Site_02	56.9045	-2.98536	10
Scotland	River North Esk	Site_03	56.7807	-2.61619	25
Scotland	River North Esk	Site_04	56.8105	-2.6533	10
Scotland	River North Esk	Site_05	56.7754	-2.51517	24
Scotland	River North Esk	Site_06	56.8075	-2.54455	24
Scotland	River North Esk	Site_07	56.895	-2.79363	20
Scotland	River North Esk	Site_08	56.8669	-2.69877	23
Scotland	River North Esk	Site_09	56.9211	-2.9385	20
Scotland	River North Esk	Site_10	56.8484	-2.84742	23
Scotland	River North Esk	Site_11	56.8178	-2.70685	20
Scotland	River North Esk	Site_12	56.7844	-2.62976	23
Scotland	Abhainn Ghriomarstaidh	Site_01	58.0005	-6.8317	21
Scotland	Abhainn Ghriomarstaidh	Site_02	58.1665	-6.73987	18
Scotland	Abhainn Ghriomarstaidh	Site_03	58.1463	-6.79674	21
Scotland	River Snizort	Site_01	57.4509	-6.30035	32
Scotland	River Snizort	Site_02	57.4142	-6.29682	32
Scotland	River South Esk	Site_01	56.7238	-2.66079	22
Scotland	River South Esk	Site_02	56.8418	-3.10528	24
Scotland	River South Esk	Site_03	56.7742	-3.02688	25
Scotland	River South Esk	Site_04	56.7055	-2.88631	24
Scotland	River South Esk	Site_05	56.7003	-2.82969	25
Scotland	River South Esk	Site_06	56.8638	-3.17108	24
Scotland	River South Esk	Site_07	56.7251	-2.98704	24
Scotland	River South Esk	Site_08	56.7533	-3.07692	24
Scotland	River South Esk	Site_09	56.8054	-3.19367	24
Scotland	River South Esk	Site_10	56.7153	-2.77722	20
Scotland	River South Esk	Site_11	56.6901	-2.60372	24
Scotland	River South Esk	Site_12	56.7158	-2.9908	25
Scotland	River South Esk	Site_13	56.7974	-3.15552	24
Scotland	River South Esk	Site_14	56.7112	-2.9788	24
Scotland	River Spey	Site_01	57.3076	-3.26996	32
Scotland	River Spey	Site_02	57.1495	-3.39618	30
Scotland	River Spey	Site_03	57.3047	-3.6683	31
Scotland	River Spey	Site_04	57.0242	-3.8971	32
Scotland	River Spey	Site_05	57.4072	-3.09838	32
Scotland	River Spey	Site_06	57.6105	-3.11144	32
Scotland	River Spey	Site_07	57.4005	-3.4627	32
Scotland	River Spey	Site_08	56.9397	-4.23609	32
Scotland	River Tay	Site_01	56.5154	-3.38674	24
Scotland	River Tay	Site_02	56.5869	-3.62544	24
Scotland	River Tay	Site_03	56.319	-4.08297	24
Scotland	River Tay	Site_04	56.337	-3.65633	24
Scotland	River Tay	Site_05	56.3726	-4.00903	24
Scotland	River Tay	Site_06	56.6467	-3.40389	24
Scotland	River Tay	Site_07	56.4106	-4.65032	32
Scotland	River Tay	Site_08	56.7454	-3.7865	24
Scotland	River Tay	Site_09	56.623	-3.15377	24
Scotland	River Tay	Site_10	56.574	-3.38853	27
Scotland	River Tay	Site_11	56.6141	-3.98097	24
Scotland	River Tay	Site_12	56.7019	-4.17258	21
Scotland	River Tweed	Site_01	55.5098	-3.12212	32
Scotland	River Tweed	Site_02	55.6149	-2.93681	32
Scotland	River Tweed	Site_03	55.489	-2.993	20
Scotland	River Tweed	Site_04	55.4778	-3.05493	31
Scotland	River Tweed	Site_05	55.689	-2.869	20
Scotland	River Tweed	Site_06	55.5188	-2.60527	30
Scotland	River Tweed	Site_07	55.6793	-2.18277	31
Scotland	River Tweed	Site_08	55.503	-3.43195	30
Scotland	River Ugie	Site_01	57.5237	-1.83396	15
Scotland	River Ugie	Site_02	57.5202	-2.03694	24
Scotland	River Ythan	Site_01	57.3984	-2.12602	22
Scotland	River Ythan	Site_02	57.4448	-2.26553	19
Scotland	River Ythan	Site_03	57.3955	-2.16505	24
England	Aln	Site_01	55.4125	-1.81789	24
England	Aln	Site_02	55.3996	-1.65838	24
England	Coquet	Site_01	55.2921	-1.74991	24
England	Coquet	Site_02	55.2885	-1.84217	24
England	Coquet	Site_03	55.3596	-2.17566	24
England	Coquet	Site_04	55.3176	-1.95574	24
England	Esk	Site_01	54.4619	-0.959033	24
England	Esk	Site_02	54.4383	-0.733578	24
England	Ouse	Site_01	54.2693	-1.70743	24
England	Ouse	Site_02	54.2783	-1.97367	24
England	Tees	Site_01	54.5178	-1.60174	24
England	Tees	Site_02	54.6131	-2.03764	24
England	Tyne	Site_01	54.9709	-2.31539	24
England	Tyne	Site_02	54.9699	-2.04102	24
England	Tyne	Site_03	55.0835	-2.21613	24
England	Tyne	Site_04	55.1753	-2.16888	24
England	Tyne	Site_05	54.9514	-2.50292	24
England	Wear	Site_01	54.6683	-1.67505	24
England	Wear	Site_02	54.8189	-1.5413	24
England	Wear	Site_03	54.7409	-2.06965	24
England	Wear	Site_04	54.6881	-1.80562	24
