# Supplementary material for: Accuracy of Assignment of Atlantic Salmon (Salmo salar L.) to Rivers and Regions in Scotland and Northeast England Based on Single Nucleotide Polymorphism (SNP) Markers
Source: PLoS One. 2016 Oct 10;11(10):e0164327. doi: 10.1371/journal.pone.0164327 (PMC5056707; doi:10.1371/journal.pone.0164327)
Supplement: S2 Table — (XLSX) [file pone.0164327.s004.xlsx]

## Sheet: S2
SNPs used in full-sib screening
SNP ID	GenBank code
BASS111_B7_B11_707	rs119097277
BASS119_B7_E10_373	rs119097303
BASS123_B7_B04_360	rs119097314
ESTNV_14268_378	rs159402884
ESTNV_18603_371	rs159401058
ESTNV_19288_484	rs159406269
ESTNV_22405_619	rs159404169
ESTNV_23346_206	rs159404191
ESTNV_24780_461	rs159406364
ESTNV_28129_298	rs159404404
ESTNV_28225_649	rs159406484
ESTNV_29115_481	rs159401086
ESTNV_29752_1360	rs159404527
ESTNV_31163_234	rs159406660
ESTNV_31226_313	rs159404667
ESTNV_31647_643	rs159404709
ESTNV_31902_575	rs159404741
ESTNV_32013_264	rs159404755
ESTNV_32170_318	rs159404771
ESTNV_32346_630	rs159406742
ESTNV_33766_718	rs159404995
ESTNV_34021_1870	rs159405040
ESTNV_34419_496	rs159405106
ESTNV_34639_1192	rs159406965
ESTNV_35022_1032	rs159407008
ESTNV_35257_1292	rs159405252
ESTNV_35759_1059	rs159405336
ESTNV_35893_841	rs159407123
ESTNV_36086_719	rs159405403
ESTNV_36576_1908	rs159405519
ESTNV_36692_1354	rs159405532
ESTNV_37023_271	rs159405608
ESTV_15230_258	rs119097085
ESTV_19099_538	rs159405949
GCR_cBin10025_Ctg1_195	rs159401149
GCR_cBin10148_Ctg1_91	rs159402943
GCR_cBin10938_Ctg1_42	rs159401182
GCR_cBin11008_Ctg1_366	rs159402964
GCR_cBin13217_Ctg1_178	rs159401287
GCR_cBin14283_Ctg1_117	rs159401325
GCR_cBin15671_Ctg1_125	rs159406104
GCR_cBin17883_Ctg1_169	rs159401467
GCR_cBin1955_Ctg1_60	rs159401529
GCR_cBin21396_Ctg1_111	rs159401587
GCR_cBin21489_Ctg1_370	rs159403235
GCR_cBin21600_Ctg1_99	rs159401597
GCR_cBin22215_Ctg1_184	rs159401625
GCR_cBin24261_Ctg1_69	rs159403315
GCR_cBin32565_Ctg1_59	rs159403514
GCR_cBin34264_Ctg1_201	rs159403551
GCR_cBin40148_Ctg1_35	rs159403660
GCR_cBin418_Ctg1_334	rs159402264
GCR_cBin4844_Ctg1_156	rs159402442
GCR_cBin49912_Ctg1_98	rs159403806
GCR_cBin5182_Ctg1_123	rs159402515
GCR_cBin6371_Ctg1_124	rs159402575
GCR_hBin3657_Ctg1_238	rs159402817
MHC_IA_33360-33530	rs159407736
BASS121_B7_D12_652	rs119097311
ESTNV_33984_1233	rs159405036
ESTNV_33984_139	rs159405037
ESTNV_37577_2265	rs159407355
ESTV_13691_455	rs159405731
ESTV_16581_357	rs159405854
GCR_cBin14803_Ctg1_153	rs159401346
GCR_cBin16182_Ctg1_117	rs159401394
GCR_cBin16390_Ctg1_190	rs159401409
GCR_cBin22893_Ctg1_88	rs159401646
GCR_cBin26476_Ctg1_61	rs159401782
GCR_cBin4889_Ctg1_182	rs159402452
GCR_cBin8502_Ctg1_66	rs159403949
GCR_cBin49462_Ctg1_84	rs159402471
GCR_cBin48984_Ctg1_170	rs159402456
GCR_cBin28510_Ctg1_183	rs159401868
GCR_cBin1951_Ctg1_118	rs159403194
GCR_cBin12902_Ctg1_491	rs159403007
GCR_cBin1129_Ctg1_459	rs159401206
ESTV_21255_1156	rs159406034
ESTNV_34251_1165	rs159406927
ESTNV_14437_168	rs159406225
GCR_cBin22493_Ctg1_478	rs159403259
GCR_cBin25739_Ctg1_176	rs159401747
GCR_cBin40624_Ctg1_148	rs159402237
ESTNV_35743_203	rs159407108
ESTNV_29085_178	rs159406529
ESTNV_37039_99	rs159407300
GCR_cBin9481_Ctg1_112_V2	rs159408323
BASS123_B7_C01_496	rs119097353
GCR_cBin30873_Ctg1_139	rs159401960
ESTV_15429_132	rs159405786
GCR_cBin16390_Ctg1_172	rs159403114
ESTNV_34055_242	rs159405049
ESTNV_36480_1354	rs159405496
ESTNV_34649_1469	rs159405149
ESTV_12158_428	rs119096970
GCR_cBin4084_Ctg1_85	rs159402244
